# Supplementary material for: Skeletal muscle mitoribosomal defects are linked to low bone mass caused by bone marrow inflammation in male mice
Source: PubMed Central journal article supplement — J Cachexia Sarcopenia Muscle. 2022 Mar 20;13(3):1785–99. doi: 10.1002/jcsm.12975 (PMC9178379; doi:10.1002/jcsm.12975), 2022-03-20

1 **Skeletal muscle mitoribosomal defects are linked to low bone mass caused by bone marrow**  
2 **inflammation in male mice**

3

4 JINGWEN TIAN<sup>1,3,#</sup>, Hyo Kyun Chung<sup>2,#</sup>, Ji Sun Moon<sup>2,3</sup>, Ha Thi Nga<sup>1,3</sup>, Ho Yeop Lee<sup>1,3</sup>, Jung Tae  
5 Kim<sup>1,2</sup>, Joon Young Chang<sup>1,2</sup>, Seul Gi Kang<sup>1,2</sup>, Dongryeol Ryu<sup>4,5</sup>, Xiangguo Che<sup>6,7</sup>, Je-Yong Choi<sup>6</sup>,  
6 Masayuki Tsukasaki<sup>8</sup>, Takayoshi Sasako<sup>9</sup>, Sang-Hee Lee<sup>10</sup>, Minho Shong<sup>1,2</sup>, and Hyon-Seung Yi<sup>1,2,3 \*</sup>,

7

8 \*Corresponding author: Hyon-Seung Yi, Research Center for Endocrine and Metabolic Diseases,

9 Chungnam National University School of Medicine, Daejeon 35015, Korea. **Phone:** +82-42-280-

10 6994; **Fax:** +82-42-280-6990; **E-mail:** jmpbooks@cnu.ac.kr

## 11 **Supplementary methods**

### 12 **Human subjects**

13 Patients with hip fracture were recruited from the Chungnam National University Hospital between  
14 October 2019 and February 2020. The participants were divided into two age- and gender-matched  
15 groups as follows: body mass index (BMI) 22–25 (n = 7) and BMI <18 (n = 7). Patients with any of  
16 the following conditions were excluded from the study: rheumatoid arthritis, neuromuscular disorders,  
17 chronic kidney disease, and mineral and bone disorders. Patients with diseases that affect bone  
18 metabolism (or those taking drugs that affect bone metabolism), with a history of any malignant or  
19 inflammatory disease, and past hormone replacement therapy were also excluded. Hand grip strength  
20 was measured using an electronic hand dynamometer (Lavisen, Namyangju, South Korea). Grip  
21 strength of the dominant hand was measured only once, in a sitting posture with 0° shoulder angle,  
22 90° elbow angle, and a neutral wrist angle. Lymphocytes were isolated from the bone marrow (BM)  
23 cells of the enrolled patients and stored at -180°C in liquid nitrogen prior to flow cytometry analysis.  
24 Muscle tissues from the *vastus lateralis* were used for immunoblots. Whole BM cells were used for  
25 real-time PCR analysis. This human study was reviewed and approved by the Institutional Review  
26 Board of Chungnam National University Hospital (CNUH 2019-10-065), according to the standards  
27 of the Declaration of Helsinki. Written and oral informed consent, documented by the Department of  
28 Internal Medicine of Chungnam National University Hospital in South Korea, was obtained from all  
29 of the participants prior to their inclusion in the study.

### 30 **Immunoblot analysis**

31 Tissues and cells were lysed in 2% sodium dodecyl sulfate (SDS) with 2 M urea, 10% glycerol,  
32 10 mM Tris-HCl (pH 6.8), 10 mM dithiothreitol, and 1 mM phenylmethylsulfonyl fluoride. The  
33 lysates were centrifuged and the supernatants were separated by SDS-polyacrylamide gel  
34 electrophoresis (PAGE). Proteins were transferred to a nitrocellulose (NC) membrane. After blocking  
35 with 5% skimmed milk, the membrane was probed using specific antibodies (see Table S2) A  
36 horseradish peroxidase-conjugated goat anti-rabbit IgG (Enzo Life Sciences, Farmingdale, NY, USA)

37 secondary antibody was used for visualization and visualized by enhanced chemiluminescence using  
38 WesternBright ECL Spray (Advansta, Menlo Park, CA, USA). . Signals were scanned using an  
39 Odyssey imager and Image Studio Software (LI-COR Biosciences, Lincoln, NE, USA). Target  
40 protein levels were normalized to those of glyceraldehyde 3-phosphate.

#### 41 **BN-PAGE**

42 To isolate mitochondria from the EDL and gastrocnemius muscle of 14-week-old control and MKO  
43 mice, samples were homogenized in isolation buffer (210 mM mannitol, 70 mM sucrose, 1 mM  
44 EGTA, and 5 mM HEPES, pH 7.2) using a Teflon-glass homogenizer. The homogenized tissues were  
45 centrifuged at  $600 \times g$  for 5 min at  $4^{\circ}\text{C}$ , and the supernatant was re-centrifuged at  $17,000 \times g$  for 10  
46 min at  $4^{\circ}\text{C}$ . The isolated mitochondrial fraction was supplemented with 0.5% (w/v) n-dodecyl- $\beta$ -D-  
47 maltoside and assessed for OxPhos complex content using a Native PAGE Novex Bis-Tris Gel system  
48 (Invitrogen, Carlsbad, CA, USA). The separated proteins were transferred to polyvinylidene fluoride  
49 membranes, which were incubated overnight at  $4^{\circ}\text{C}$  with an anti-OxPhos antibody cocktail  
50 (Invitrogen, #45-8099, #45-7999), followed by analysis using the Western Breeze Chromogenic  
51 Western Blot Immunodetection Kit (Invitrogen).

#### 52 **Immunohistochemistry**

53 Transverse  $12 \mu\text{m}$  muscle sections were mounted on Super Frost microscope slides (Thermo Fisher  
54 Scientific, Waltham, MA, USA). Muscle fiber type-specific diameter measurements were obtained at  
55 14 weeks-of-age using  $12 \mu\text{m}$ -thick SDH-stained cross-sections. Sections were outlined with a PAP  
56 pen (Research Products International) and incubated for 45 min at room temperature in buffer solution  
57 (20 mM phosphate buffer, 7.5% sucrose, 0.027% sodium succinate, and 10 mg nitrobluetetrazoleum).  
58 The sections were dehydrated and then rinsed briefly in 30%, 60%, and 90% acetone/distilled water in  
59 ascending and then descending order. Finally, they were rinsed in distilled water, air-dried, and cover-  
60 slipped using VectaMount (Vector Labs).

61 For laminin and Myosin heavy chain Type IIB (MyHC2b) staining, muscle tissue was embedded in  
62 FSC 22 Frozen Media (Leica Biosystems, IL, USA). Transverse (7  $\mu$ m) muscle sections were incubated  
63 overnight at 4°C with rabbit anti-laminin (Abcam, ab11575 1:500 dilution) and mouse anti-MyHC type  
64 2b (DSHB, BF-F3, 1:500 Dilution) antibodies in 5% goat serum blocking solution, and then washed  
65 three times with 1X PBS. Finally, sections were incubated for 45 minutes with Alexa Fluor 488 goat  
66 anti-rabbit IgG (Invitrogen, 1:1000 Dilution) and Alexa Fluor 555 goat anti-mouse IgG (Invitrogen,  
67 1:1000 Dilution).

### 68 **Micro-CT analysis**

69 Micro-CT was performed on vertebrae and long bones using an eXplore Locus SP scanner (GE  
70 Healthcare, London, Canada) with 8  $\mu$ m resolution. All bone morphometric parameters were  
71 calculated three-dimensionally by eXplore MicroView version 2.2 (GE Healthcare), which was used  
72 for measuring number of trabecular (Tb.N) , bone volume/total volume (BV/TV), trabecular thickness  
73 (Tb.Th), and trabecular separation (Tb.Sp), cortical volume (Ct.V), cortical thickness (Ct.Th). Bone  
74 parameters and density were analyzed at the region between 0.7 and 2.3 mm below the growth plate of  
75 the distal femur. Cancellous bone was analyzed in the distal area extending proximally 1.75 mm from  
76 the end of the primary spongiosa. All bone micro-CT nomenclature follows the guidelines of the  
77 American Society for Bone and Mineral Research (ASBMR).

### 78 **Mouse grip strength and wire hanging test**

79 Experiments were performed using a digital force-gauging apparatus (GS 5000; Borj Sanat, Iran).  
80 Mice were allowed to grasp the pull bar with the forelimbs. Then, they were pulled gently away from  
81 the bar by the tail until they released the bar. Mice were not trained before testing. The maximum  
82 force prior to release of the mouse's paw from the bar was recorded. The test was repeated five times,  
83 and the average value of five consecutive measurements was reported as the mouse's "grip strength".  
84 The wire hanging test was conducted to assess motor function and neuromuscular grip strength. The  
85 mouse was placed on a cross-grip wire rack, which was then turned upside down 20 cm above a cage

86 filled with soft bedding, after which hanging time was recorded. The average latency to fall of four  
87 trials was calculated for each animal. The maximum hanging time was used in the analyses.

## 88 **RNA sequencing**

89 Total RNA was prepared from EDL and BM cells obtained from 10-week-old control and MKO mice  
90 ( $n = 2$  for each) using TRIzol reagent. The integrity of the total RNA was assessed using an Agilent  
91 2100 Bioanalyzer System (Agilent Technologies, Loveland, CO, USA) and an Agilent RNA 6000  
92 Nano Kit (Agilent Technologies, Loveland, CO, USA). The library was prepared using a TruSeq  
93 3000/4000 SBS Kit, v3. Pre-processed the raw reads from the sequencer to remove results from low-  
94 quality RNA or artifacts such as adaptor sequences, contaminant DNA, and PCR duplicates. The  
95 quality of the data produced is determined by the phred quality score for each base. The FastQC  
96 quality control tool gives a box plot of average base quality per cycle; a phred quality score of 20  
97 means that the assignment to that base is 99% accurate. Generally a phred score  $\geq 20$  denotes good  
98 quality: 97.19% of those in the present study were  $\geq 30$ . The obtained reads were mapped to a  
99 reference *Mus musculus* (mm10) genome using HISAT2 v2.0.5. HISAT uses two types of index for  
100 alignment (a global, whole-genome index and tens of thousands of small local indices). These aligned  
101 reads were then assembled from known genes/transcripts using a reference gene model in StringTie  
102 v.1.3.3b. Transcript frequencies were quantified as normalized values, taking into account transcript  
103 length and depth of coverage. Relative transcript abundance was expressed as fragments per kilobase  
104 of transcript per million fragments mapped (FPKM), and FPKM values  $\leq 0$  were excluded. One was  
105 added to each FPKM value for filtered genes, the filtered data were  $\log_2$ -transformed, and quantile  
106 normalization was applied. Differentially expressed gene (DEG) analysis was performed using FPKM  
107 values. Genes with a fold change  $> 2$  and an independent t-test  $P$ -value  $< 0.05$  were extracted from the  
108 results of DEG analysis. A heatmap was produced by color-coding standardized log gene expression  
109 levels (mean, zero; standard deviation, one) using R 3.5.1 available at <http://www.r-project.org>. Probe  
110 sets are shown as hierarchically clustered by similarity, based on Euclidean distance and the Ward  
111 aggregation algorithm.

## 112 **RNA sequencing analysis using bioinformatics tools**

113 DEGs were then subjected to hierarchical clustering and phenotype ontology using Network2Canvas  
114 (<http://maayanlab.net/N2C/>). Phenotype categories were visualized on the grid according to gene-list  
115 similarity, with enriched categories being indicated by circles. Gene Set Enrichment Analysis  
116 (GSEA) (<http://www.broadinstitute.org/gsea>) was performed using transcriptome data from the BM  
117 cells from control and MKO mice. Bioinformatic analysis was carried out with R package v3.2.5,  
118 available at <http://www.r-project.org>. A heatmap was produced by color-coding standardized log gene  
119 expression levels (mean, zero; standard deviation, one). Probe sets are shown as hierarchically  
120 clustered by similarity, based on Euclidean distance and the Ward aggregation algorithm. We also  
121 used G-MAD in GeneBridge tools (available at <http://systems-genetics.org>, an open resource), which  
122 uses expression data from large-scale cohorts to propose potential functions of genes and allows the  
123 annotation of gene function.

## 124 **Treatment with AMD3100 *in vivo***

125 Control and MKO mice (9 weeks-of-age) were injected intraperitoneally with 5 mg/kg PBS or  
126 AMD3100 (Sigma-Aldrich #A5602; St. Louis, MO, USA; Sigma-Aldrich.com), three times per week  
127 for 3 weeks. At the end of treatment, the mice were sacrificed and blood samples were collected for  
128 measurement of proinflammatory cytokines and markers of bone turnover. Femurs and tibiae were  
129 removed, fixed with 4% paraformaldehyde in PBS solution (pH 7.4) for 16 h, and then stored at 4°C  
130 in 80% ethanol prior to measurement of bone mineral density (BMD) using micro-CT.

## 131 **Serum measurements.**

132 Blood samples were collected by cardiac puncture of mice under general anesthesia. Samples were  
133 centrifuged at 10,000 rpm for 5 min, and the supernatant was used for assaying triglycerides, total  
134 cholesterol, alanine aminotransferase, and aspartate transaminase using a DRI-CHEM 4000i automated  
135 system (Fujifilm, Tokyo, Japan). Serum levels of TNF- $\alpha$  and IL-17A were determined using a specific  
136 enzyme-linked immunosorbent assay (ELISA; TNF- $\alpha$ , BD Bioscience, NJ, USA; IL-17A, Sigma-

137 Aldrich, St. Louis, MO, USA) following the manufacturer's protocol. C-telopeptide (CTX), procollagen  
138 type 1 N propeptide (P1NP), testosterone, T3, and T4 were measured by ELISAs. Serum levels of T3,  
139 T4, and testosterone were measured using an ELISA kit (T3 and T4, Merck-Millipore, Darmstadt,  
140 Germany; testosterone, ALPCO, Salem, NH, USA). Serum parathyroid hormone (PTH) levels were  
141 measured using the mouse intact PTH ELISA kit (Immutopics International, San Clemente, CA, USA).  
142 Serum FGF21 and GDF15 levels were assayed with a commercial ELISA kit (R&D Systems,  
143 Minneapolis, MN, USA).

#### 144 **Preparation of BM cells from mice and humans**

145 Control and MKO mice (14 weeks-of-age) were anesthetized by intraperitoneal injection of sterile  
146 avertin (tribromoethanol: 200 mg/10 ml/kg), and then tibias and fibulas were removed. The BM cells  
147 were flushed from the medullary cavities of the excised bones and suspended in RPMI-1640 medium  
148 containing 10% fetal bovine serum (FBS). Human BM cells were isolated from patients who underwent  
149 hip arthroplasty at the Chungnam National University Hospital between October 2019 and February  
150 2020. The BM cells were extracted from the femoral neck cutting area without bacterial contamination,  
151 and were subjected to flow cytometry and real-time PCR analysis. The demographic and clinical  
152 characteristics of the patients with a BMI of <18 kg/m<sup>2</sup> and 22–25 kg/m<sup>2</sup> that were included in this study  
153 are shown in Table S1.

#### 154 **RNA extraction and real-time PCR analysis.**

155 Total RNA was extracted from the BM cells using TRIzol reagent (Life Technologies, Eugene, OR,  
156 USA). Complementary DNA (cDNA) was synthesized from total RNA using M-MLV reverse  
157 transcriptase and oligo-dT primers (Invitrogen, Carlsbad, CA, USA). Specific sequences were amplified  
158 from each cDNA sample using SYBR Green PCR Master Mix (Applied Biosystems, Foster City, CA,  
159 USA) and specific primers (Tables S3, 4) using a 7500 Real-Time PCR System and Software, v2.0.6  
160 (Applied Biosystems). The comparative Ct method was used to determine relative expression, with 18s  
161 ribosomal RNA as the reference gene.

162 **Measurement of BMD in human subjects.**

163 BMD was measured in the lumbar spine (1st–4th lumbar vertebrae) and femoral neck of the participants  
164 with hip fracture using dual energy X-ray absorptiometry with a Discovery (Hologic Inc., Marlborough,  
165 MA, USA) scanner. All BMD scans were conducted by well-trained examiners using standardized  
166 procedures following the manufacturer's recommended protocols. The lumbar BMD of 30 patients was  
167 measured with two consecutive measurements per patient. Any scans comprising metal or other  
168 attenuating material in the region of interest, as well as any scans of poor quality were discarded. The  
169 precision error of the lumbar BMD measurement was 1.4%, which was lower than the minimum  
170 acceptable precision error of 1.9% for the lumbar spine.

171 **Rotarod test of coordination.**

172 Mice were trained at 10 rpm on an Economex rotarod fitted with a 3 cm-diameter rod (Columbus  
173 Instruments, Columbus, OH, USA), and the latency to fall (maximum 60 s) was measured to evaluate  
174 motor coordination and balance. Fixed speed rotarod assessment was performed at a constant speed of  
175 10 rpm with a 300 s maximum time limit. After acclimation, all mice received training for 2 consecutive  
176 days. On the test day, the mice were tested in three consecutive trials of 1 min each, with 1 min rest  
177 between trials. The latency to fall during each of the three trials was averaged to give the overall time  
178 for each mouse.

179 **Measurement of grip strength in human subjects.**

180 Grip strength was measured using a digital handheld dynamometer in a sitting position with elbows  
181 unsupported forming an angle of 90° (Lavisen, Hanam, Korea). Participants were asked to apply the  
182 maximum grip strength three times in the dominant hand. Between each measurement, at least 30 s of  
183 rest was allowed. Grip strength was defined as the maximally measured grip strength of the dominant  
184 hand.

185 **Transmission electron microscopy**



186 Gastrocnemius muscle samples from mice were fixed in 1% (wt/vol) glutaraldehyde at 4°C and then  
187 washed with 0.1 M cacodylate buffer, pH 7.2, at 4°C. Washed muscle tissues were fixed for 1 h at 4°C  
188 with 1% (wt/vol) OsO<sub>4</sub> in 0.1 M cacodylate buffer, pH 7.2, containing 0.1% (wt/vol) CaCl<sub>2</sub>. Muscle  
189 samples were dehydrated by graded series of ethanol and propylene oxide treatment, and then embedded  
190 in Embed-812 (Electron Microscopy Sciences). The resin blocks were then polymerized at 60°C for 48  
191 h. Tissues were sectioned with an EM UC6 ultramicrotome (Leica Microsystems, Vienna, Austria) and  
192 post-stained with 4% (wt/vol) uranyl acetate and citrate. Specimens were observed on a JEM ARM  
193 1300S high-voltage electron microscope (JEOL, Japan).

#### 194 ***In vitro* osteoclastogenesis**

195 Femurs were removed aseptically from 8–9-week-old C57BL/6J mice and BM cells were flushed out  
196 with a sterile 21-gauge syringe. The cells were cultured in alpha-MEM containing 10% FBS and 30  
197 ng/mL M-CSF (R&D Systems, Minneapolis, MN, USA). After 2 days, adherent cells were used as bone  
198 marrow-derived monocyte/macrophages. To generate osteoclasts, these cells were further cultured in  
199 the presence of 30 ng/mL of RANKL and 10 ng/mL of M-CSF with or without recombinant CXCL12  
200 (5 ng/mL). After 3 days, the cells were fixed and stained for tartrate-resistant acid phosphatase (TRAP)  
201 using the TRAP staining kit (Sigma-Aldrich, St. Louis, MO, USA), and the number of TRAP-positive  
202 multinucleated (> 3 nuclei) cells (MNCs) and TRAP-positive larger (> 100 µm) MNCs were counted.

#### 203 **Osteoblast experiment**

204 Murine pre-osteoblastic MC3T3-E1 cells were purchased from the American Tissue Culture Collection.  
205 The cells were cultured in alpha-MEM containing 10% FBS, ascorbic acid (50 µg/mL), β-  
206 glycerophosphate (5 mM), and recombinant BMP2 (100 µg/mL) with or without recombinant CXCL12  
207 (5 ng/mL) to induce osteoblast differentiation. After 5 days, the cells were fixed and stained with  
208 alkaline phosphatase to detect osteogenic differentiation.

#### 209 **T-cell activation**

210 BM cells were isolated from femurs of 8–9 week-old C57BL/6J mice. The cells were seeded in 24-well  
211 plates and cultured in RPMI-1640 medium containing 10% FBS with or without recombinant CXCL12  
212 (5 ng/mL). After 24 h, floating cells were collected, stimulated for 5 h with Cell Stimulation Cocktail  
213 (eBioscience, San Diego, CA, USA), and then harvested. The cells were fixed and permeabilized using  
214 Fixation/Permeabilization Buffer kit (eBioscience, San Diego, CA, USA), and then stained for  
215 intracellular cytokines with anti-TNF- $\alpha$ -APC and anti-IL-17A-PE antibodies. Multicolor flow  
216 cytometry was performed using a LSRFortessa flow cytometer (BD Biosciences, NJ, USA), and the  
217 data were analyzed using FlowJo software (Tree Star, Ashland, OR, USA). Results are expressed as  
218 cell frequency (%).

## 219 **Supplementary figure legends**

220 **Fig. S1 Generation of the skeletal muscle-specific mitochondrial oxidative phosphorylation**  
221 **(OxPhos) dysfunction mouse model.** (A) Strategy for generating MKO mice through disrupting *Crif1*  
222 in skeletal muscle using the MLC1f (myosin light chain 1f)-Cre mice through Cre-LoxP system. (B, C)  
223 Immunoblotting and band density measurement of OxPhos complex subunits in soleus muscle from 14-  
224 week-old control and MKO mice,  $n = 3$ . (D) Mitochondrial morphology of controls and MKO mice,  
225 visualized by electron microscopy; scale bars: 1  $\mu\text{m}$ . (E, F) Immunoblotting and band density  
226 measurement of CRIF1 and OxPhos; complex subunits in BM and cortical bone of femur from 14-  
227 week-old control and MKO mice,  $n=3$ . (G) Body weight evolution of control and MKO mice fed a  
228 chow diet for 8 weeks,  $n = 10$  per group. Data are expressed as the mean  $\pm$  SEM. Statistical significance  
229 was analyzed by unpaired t-tests. \*\*,  $P < 0.01$  compared with the indicated group.

230 **Fig. S2 Micro-CT analysis of vertebrae and femurs of control and MKO mice at 14 weeks-of-age.**  
231 (A) The cortical area in femurs of control and MKO mice were measured by micro-CT. (B) Cortical  
232 bone area/total tissue area (Ct.Ar/Tt.Ar; %) was measured in femurs of control and MKO mice. (C, D)  
233 Measurement of bone volume (BV)/total volume (TV) using von Kossa staining of vertebrae and femurs  
234 from 14-week-old control and MKO mice,  $n = 5$ . (E, F) Quantitative analysis of eroded surface per bone  
235 surface (%) and osteoclast surface (%) of tibiae from 14-week-old control and MKO mice,  $n = 4$ . Data  
236 are expressed as the mean  $\pm$  SEM. Statistical significance was analyzed by unpaired t-tests. \*,  $P < 0.05$   
237 and \*\*,  $P < 0.01$  compared with the indicated group.

238 **Fig. S3 Measurement of serum levels of hormones affecting bone metabolism in control and MKO**  
239 **mice.** (A-D) Serum concentrations of intact parathyroid hormone (iPTH), testosterone, T4, and T3 in  
240 14-week-old control and MKO mice,  $n = 7$ /group. Data are expressed as the mean  $\pm$  SEM.

241 **Fig. S4 FGF21 is highly induced by mitochondrial stress in skeletal muscle of MKO mice.** (A)  
242 Scatterplots of RNA sequencing data, displaying transcript levels in EDL of control (x-axis) and MKO  
243 (y-axis) mice at 10 weeks-of-age. The text indicates that mitokines show much higher fold change in  
244 MKO mice. (B, C) Volcano plot and heat map showing upregulated genes in EDL from normal chow  
245 diet-fed control and MKO mice at 10 weeks-of-age. (D) Relative expression of mRNA encoding *Fgf21*  
246 in EDL from 14-week-old control and MKO mice,  $n = 6$ . (E) Serum levels of FGF21 in 14-week-old  
247 control and MKO mice,  $n = 6$ . (F) Strategy for generating FGF21/CRF1 double knockout mice (MFKO)  
248 and genotype analysis using real-time PCR. (G) *Crif1* and *Fgf21* expression in the extensor digitorum  
249 longus muscle of MKO and MFKO mice at 6 weeks-of-age. Data are expressed as the mean  $\pm$  SEM.  
250 \*\*,  $P < 0.01$  compared with the corresponding controls.

251 **Fig. S5 Lower bone mass in MKO mice is independent of FGF21 production caused by**  
252 **mitochondrial stress in skeletal muscle.** (A) Micro-CT images of the trabecular bone (Tr.b) near the  
253 distal femoral metaphyseal region of control and MKO mice at 14 weeks-of-age. Scale bar for the front  
254 view and 3D image of the Tr.b = 1000 and 500  $\mu\text{m}$ , respectively;  $n = 4$ . (B) Measurement of Tb.Th.,  
255 Tb.N., BV/TV, BS/TV, BS/BV, Ct.V., Tb.Sp., and TBV using micro-CT analysis. Data are expressed  
256 as the mean  $\pm$  SEM. Statistical significance was analyzed by unpaired t-tests.

257 **Fig. S6 Measurement of serum levels of proinflammatory cytokines in 14-week-old control and**  
258 **MKO mice.** (A) Serum TNF- $\alpha$  and IL-17A concentrations in control ( $n = 7$ ) and MKO ( $n = 7$ ) mice at  
259 14 weeks-of-age. (B) A representative section of tibia from a 14-week-old control and MKO mouse  
260 stained with H&E. Adipocyte-rich BM (arrowhead) are visible in the MKO mice. Scale bars, 100  $\mu\text{m}$ .  
261 Quantification of the **number of adipocytes** per bone marrow surface area ( $\text{mm}^2$ ) in control ( $n = 4$ ) and  
262 MKO ( $n = 4$ ) mice at 14 weeks-of-age. Data are expressed as the mean  $\pm$  SEM. \*\*,  $P < 0.01$  compared  
263 with the corresponding controls.

264 **Fig. S7 Analysis of RNA sequencing data from BM cells of control and MKO mice.** (A, B) The  
265 analysis was performed using Network2Canvas. Genes that were significantly upregulated in the BM  
266 cells of control and MKO mice were analyzed for gene-list enrichment, with gene set libraries created

267 from level 4 of the MGI mouse phenotype ontology using Network2Canvas. (C) *Cxcl12* mRNA  
268 expression by BM cells from control and MKO mice at 14 weeks-of-age. (D) In the G-MAD analysis,  
269 CXCL12 associates with T-cell proliferation and CXCR chemokine receptor binding modules in mice.  
270 The threshold of significant gene-module association is indicated by the red dashed line. Modules are  
271 organized by module similarities. Known modules connected to CXCL12 are highlighted in red. Data  
272 are expressed as mean  $\pm$  SEM. \*,  $P < 0.05$  and \*\*,  $P < 0.01$  compared with the corresponding controls.

273 **Fig. S8 Flow cytometry analysis of BM cells from 12-week-old control and MKO mice treated**  
274 **with or without AMD3100.** (A) Populations of CD4<sup>+</sup> and CD8<sup>+</sup> T-cells from control and MKO mice  
275 treated with or without AMD3100 for 3 weeks. (B-E) IFN- $\gamma$ - and TNF- $\alpha$ -producing CD4<sup>+</sup> and CD8<sup>+</sup>  
276 T-cells in the BM from control and MKO mice treated with or without AMD3100 for 3 weeks. (F)  
277 Statistical analysis of phenotypes defined by flow cytometry in the BM from control and MKO mice  
278 treated with or without AMD3100 for 3 weeks. Data are expressed as mean  $\pm$  SEM. Statistical  
279 significance was analyzed by one-way ANOVA. \*,  $P < 0.05$  and \*\*,  $P < 0.01$  compared with the  
280 indicated group.

281 **Fig. S9 Micro-CT analysis and measurement of serum markers of liver injury and lipid**  
282 **metabolism.** (A,B) Cortical bone area/total tissue area (Ct.Ar/Tt.Ar; %) was measured in tibia and  
283 femurs of control and MKO mice treated with or without AMD3100. (C-F) Serum levels of aspartate  
284 transaminase (AST), alanine aminotransferase (ALT), total cholesterol (CHOL), and triglyceride (TG)  
285 from 12-week-old control and MKO mice treated with or without AMD3100. Data are expressed as  
286 mean  $\pm$  SEM. Statistical significance was analyzed by one-way ANOVA. \*,  $P < 0.05$  and \*\*,  $P < 0.01$   
287 compared with the indicated group.

288 **Fig. S10 Grip strength and flow cytometry analysis of BM cells of patients with hip fracture.** (A)  
289 Measurement of grip strength of the hip fracture patients using a handheld dynamometer. (B)  
290 Representative blots showing BN-PAGE of the assembled OxPhos complex in vastus lateralis muscle  
291 from patients with lower (<18 kg/m<sup>2</sup>) or normal (22–25 kg/m<sup>2</sup>) BMI. (C) Populations of CD4<sup>+</sup> and  
292 CD8<sup>+</sup> T-cells from the hip fracture patients with lower (<18 kg/m<sup>2</sup>) or normal (22–25 kg/m<sup>2</sup>) body mass  
293 index (BMI). (D, E) Naïve (CD45RA<sup>+</sup>CD45RO<sup>-</sup>) and memory (CD45RA<sup>-</sup>CD45RO<sup>+</sup>) CD4<sup>+</sup> and  
294 CD8<sup>+</sup> T-cells in the BM from the hip fracture patients with lower or normal BMI. (F) BM senescent  
295 (CD28<sup>-</sup>CD57<sup>+</sup>) CD4<sup>+</sup> and CD8<sup>+</sup> T-cells from hip fracture patients with lower (<18) or normal (22–25)  
296 BMI. (G-J) Transcript levels of *CXCL12*, *CD44*, *TNF*, and *IL17A* in the BM from hip fracture patients  
297 with lower (<18) or normal (22–25) BMI. Data are expressed as mean  $\pm$  SEM. \*,  $P < 0.05$  and \*\*,  $P <$   
298 0.01 compared with the corresponding controls.

299 **Fig. S11 Serum levels of mitokines in patients with hip fracture.** (A, B) Serum FGF21 and GDF15  
300 levels were measured in hip fracture patients with lower (<18 kg/m<sup>2</sup>) or normal (22–25 kg/m<sup>2</sup>) BMI.  
301 Data are expressed as the mean  $\pm$  SEM. \*,  $P < 0.05$  compared with the corresponding controls.

302 **Supplementary tables**303 **Table S1. Demographics and baseline characteristics of the human subjects**

| BMI (kg/m <sup>2</sup> ) | No. | Gender | Age (years) | BMI   | Grip strength (Kg) | T score | Hip fracture site   |
|--------------------------|-----|--------|-------------|-------|--------------------|---------|---------------------|
| 22–25                    | 1   | M      | 75          | 22.73 | 31.6               | -1.9    | Lt. intertrochanter |
|                          | 2   | F      | 68          | 24.9  | 22.5               | -2.4    | Rt. neck            |
|                          | 3   | M      | 69          | 23.1  | 28.9               | -1.7    | Rt. neck            |
|                          | 4   | F      | 66          | 23.5  | 19.3               | -2.9    | Lt. intertrochanter |
|                          | 5   | M      | 61          | 24.6  | 30.5               | -2.2    | Rt. intertrochanter |
|                          | 6   | M      | 77          | 22.8  | 33.2               | -1.8    | Lt. neck            |
|                          | 7   | M      | 72          | 24.2  | 27.3               | -2.5    | Lt. neck            |
| <18                      | 1   | M      | 78          | 17.6  | 25.3               | -2.2    | Rt. neck            |
|                          | 2   | M      | 61          | 17.1  | 23.6               | -2.6    | Rt. intertrochanter |
|                          | 3   | M      | 80          | 17.5  | 21.2               | -2.9    | Rt. intertrochanter |
|                          | 4   | M      | 66          | 16.8  | 26.9               | -2.6    | Lt. neck            |
|                          | 5   | M      | 65          | 17.3  | 24.4               | -2.8    | Rt. neck            |
|                          | 6   | F      | 72          | 17.6  | 15.2               | -3.6    | Lt. neck            |
|                          | 7   | F      | 70          | 16.5  | 13.6               | -3.8    | Lt. intertrochanter |

BMI, body mass index.

Lt, left.

Rt, right.

304

305

306

307

308

309

310

311

312

313

314

315

316

317 **Table S2. Antibodies used for flow cytometry analysis**

| <b>Antibody<br/>target/reagent</b> | <b>Fluorochrome</b> | <b>Clone</b> | <b>Supplier</b> | <b>Cat. No.</b> |
|------------------------------------|---------------------|--------------|-----------------|-----------------|
| Fc block                           |                     | 2.4G2        | BD Bioscience   | 553142          |
| Fixable viability dye              | APC-Cy7             |              | eBioscience     | 65-0865         |
| hCD4                               | Alexa Fluor 700     | RPA-T4       | eBioscience     | 56-0049         |
| hCD8a                              | PE                  | RPA-T8       | eBioscience     | 12-0088         |
| hCD8a                              | APC                 | RPA-T8       | eBioscience     | 17-0088         |
| hCD3                               | PerCP-Cy5.5         | SK7          | eBioscience     | 46-0036         |
| hCD3                               | PE-Cy7              | UCHT1        | eBioscience     | 25-0038         |
| hCD57                              | FITC                | TB01         | eBioscience     | 11-0577         |
| hCD28                              | APC                 | CD28.2       | eBioscience     | 17-0289         |
| hIFNG                              | PE-Cy7              | 4S.B3        | eBioscience     | 25-7319         |
| hTNFA                              | APC                 | MAb11        | eBioscience     | 17-7349         |
| hIL17A                             | APC                 | eBio64DEC17  | eBioscience     | 17-7179         |
| mIL17A                             | PE                  | eBio17B7     | eBioscience     | 12-7177         |
| mTNF- $\alpha$                     | PerCP-eF710         | MP6-XT22     | eBioscience     | 46-7321         |
| mTNF- $\alpha$                     | APC                 | MP6-XT22     | eBioscience     | 17-7321         |
| mIFNG                              | PE                  | XMG1.2       | eBioscience     | 12-7311         |
| mIFNG                              | PE-Cy7              | XMG1.2       | eBioscience     | 25-7311         |
| h/mCD44                            | FITC                | IM7          | eBioscience     | 11-0441         |
| mNK1.1                             | PE                  | PK136        | eBioscience     | 12-5941         |
| mCD62L                             | APC                 | MEL-14       | eBioscience     | 17-0621         |
| mCD4                               | Per-cp-eF710        | GK1.5        | eBioscience     | 46-0041         |
| hCD4                               | FITC                | RPA-T4       | eBioscience     | 11-0049         |
| hCD3                               | PE-eF610            | UCHT1        | eBioscience     | 61-0038         |

|         |        |        |             |         |
|---------|--------|--------|-------------|---------|
| hCD3    | SB436  | UCHT1  | eBioscience | 62-0038 |
| hCD8a   | SB436  | RPA-T8 | eBioscience | 62-0088 |
| hTNFA   | PE-Cy7 | Mab11  | eBioscience | 25-7349 |
| hIFNG   | APC    | 4S.B3  | eBioscience | 50-7319 |
| hCD45RA | FITC   | HI100  | eBioscience | 11-0458 |
| hCD45RO | PE-Cy7 | UCHL1  | eBioscience | 25-0457 |
| hFOXP3  | APC    | PCH101 | eBioscience | 17-4776 |
| h/mCD44 | SB436  | IM7    | eBioscience | 62-0441 |
| hTNFA   | PE     | Mab11  | eBioscience | 12-7349 |

319 **Table S3. Primers used for real-time PCR (mouse)**

| Genes           | Forward (5'–3')        | Reverse (5'–3')         |
|-----------------|------------------------|-------------------------|
| <i>Ppargc1a</i> | GAGCTACGGGGTTCGCTTC    | GGGACCCCAATCTCACCT      |
| <i>Lonpl</i>    | TGCGGAAACGCTAC AGGAC   | GGAACAGAGCCCGGTGAAGG    |
| <i>Clpp</i>     | AAGCCTGTAGCCCACGTCGTA  | AAGGTACAACCCATCGGCTGG   |
| <i>Hspd1</i>    | CCTCTCTCTAATCAGCCCTCTG | GAGGACCTGGGAGTAGATGAG   |
| <i>Tid1</i>     | GCCCATCCTCTGTGACTCAT   | AGGCCACAGGTATTTTGTCTG   |
| <i>Chop</i>     | TCCATCCAGTTGCCTTCTTG   | TTCCACGATTTCCAGAGAAC    |
| <i>Atf4</i>     | TCAGCCAGATGCAGTTAACGC  | TCTGGACCCATTCCTTCTTGG   |
| <i>Fgf21</i>    | CAAATCTCCAACCCATGCT    | CACCACCAGGGTCTTCAAGT    |
| <i>Tnf</i>      | ATCGCAAACAAGCTGACCTG   | AGATCCAGGTTTGAGGTGGG    |
| <i>Rankl</i>    | CCCTTGATGAAGAGGGATCA   | ACTCCACAGGTGGGAACAAG    |
| <i>Rorat</i>    | TCCTCCAGGGATCCAACGA    | GGCAGGCGGGAGGTCTT       |
| <i>Rorgt</i>    | CTGGGCTACTGAGCACC      | AAGTGGTCGTTGAGGGCAATG   |
| <i>Il17a</i>    | GCAAGAGATCCTGGTCCTGA   | AGCATCTTCTCGACCCTGAA    |
| <i>18s</i>      | CTGGTTGATCCTGCCAGTAG   | CGACCAAAGGAACCATAACT    |
| <i>Oscar</i>    | TCGCTGATACTCCAGCTGTC   | ATCCCAGGAGTCACAACCTGC   |
| <i>Ctsk</i>     | GCAGGATGTGGGTGTTCAAGT  | TCCAGCATTTCTCCGGAG      |
| <i>Nfatc1</i>   | AATTAGGAGTGGGGGATCGT   | ATCCAACCCAACCTCGCCT     |
| <i>Acp5</i>     | CGTCTCTGCACAGATTGCAT   | GAGTTGCCACACAGCATCAC    |
| <i>Itgb3</i>    | GGCGTTGTTGTTGGAGAGTC   | CTTCAGGTTACATCGGGGTGA   |
| <i>Mmp9</i>     | TAGCTACCTCGAGGGCTTCC   | GTGGGACACATAGTGGGAGG    |
| <i>Runx2</i>    | GACTGTGGTTACCGTCATGGC  | ACTTGGTTTTTCATAACAGCGGA |
| <i>Alpl</i>     | GGCTGGAGATGGACAAATTCC  | CCGAGTGGTAGTCACAATGCC   |
| <i>Bmp2</i>     | TCTTCCGGGAACAGATACAGG  | TGGTGTCCAATAGTCTGGTCA   |
| <i>Bglap</i>    | CTGACCTCACAGATCCCAAGC  | TGGTCTGATAGCTCGTCACAAG  |
| <i>Sparc</i>    | TGGGAGAATTTGAGGACGGTG  | GAGTCGAAGGTCTTGTGTGCAT  |





321 **Table S4. Primers used for real-time PCR (human)**

| Genes         | Forward (5'–3')         | Reverse (5'–3')         |
|---------------|-------------------------|-------------------------|
| <i>CXCL12</i> | CTGCCGCTTTGCAGGTGTA     | CATTGTGGGCAAGGTGCTATT   |
| <i>CD44</i>   | ATTGTCCAGGCCAATACACATT  | CCTCTCTACCTGCGTATCGTTTT |
| <i>TNF</i>    | AAGGGGCAAAATGGTTCTTTTCG | GCACCTGTATGTCCCCGAG     |
| <i>IL17A</i>  | TCGGTAACTGACTTGAATGTCCA | TCGCTTCCCTGTTTTAGCTGC   |
| <i>ACTB</i>   | CATGTACGTTGCTATCCAGGC   | CTCCTTAATGTCACGCACGAT   |

322

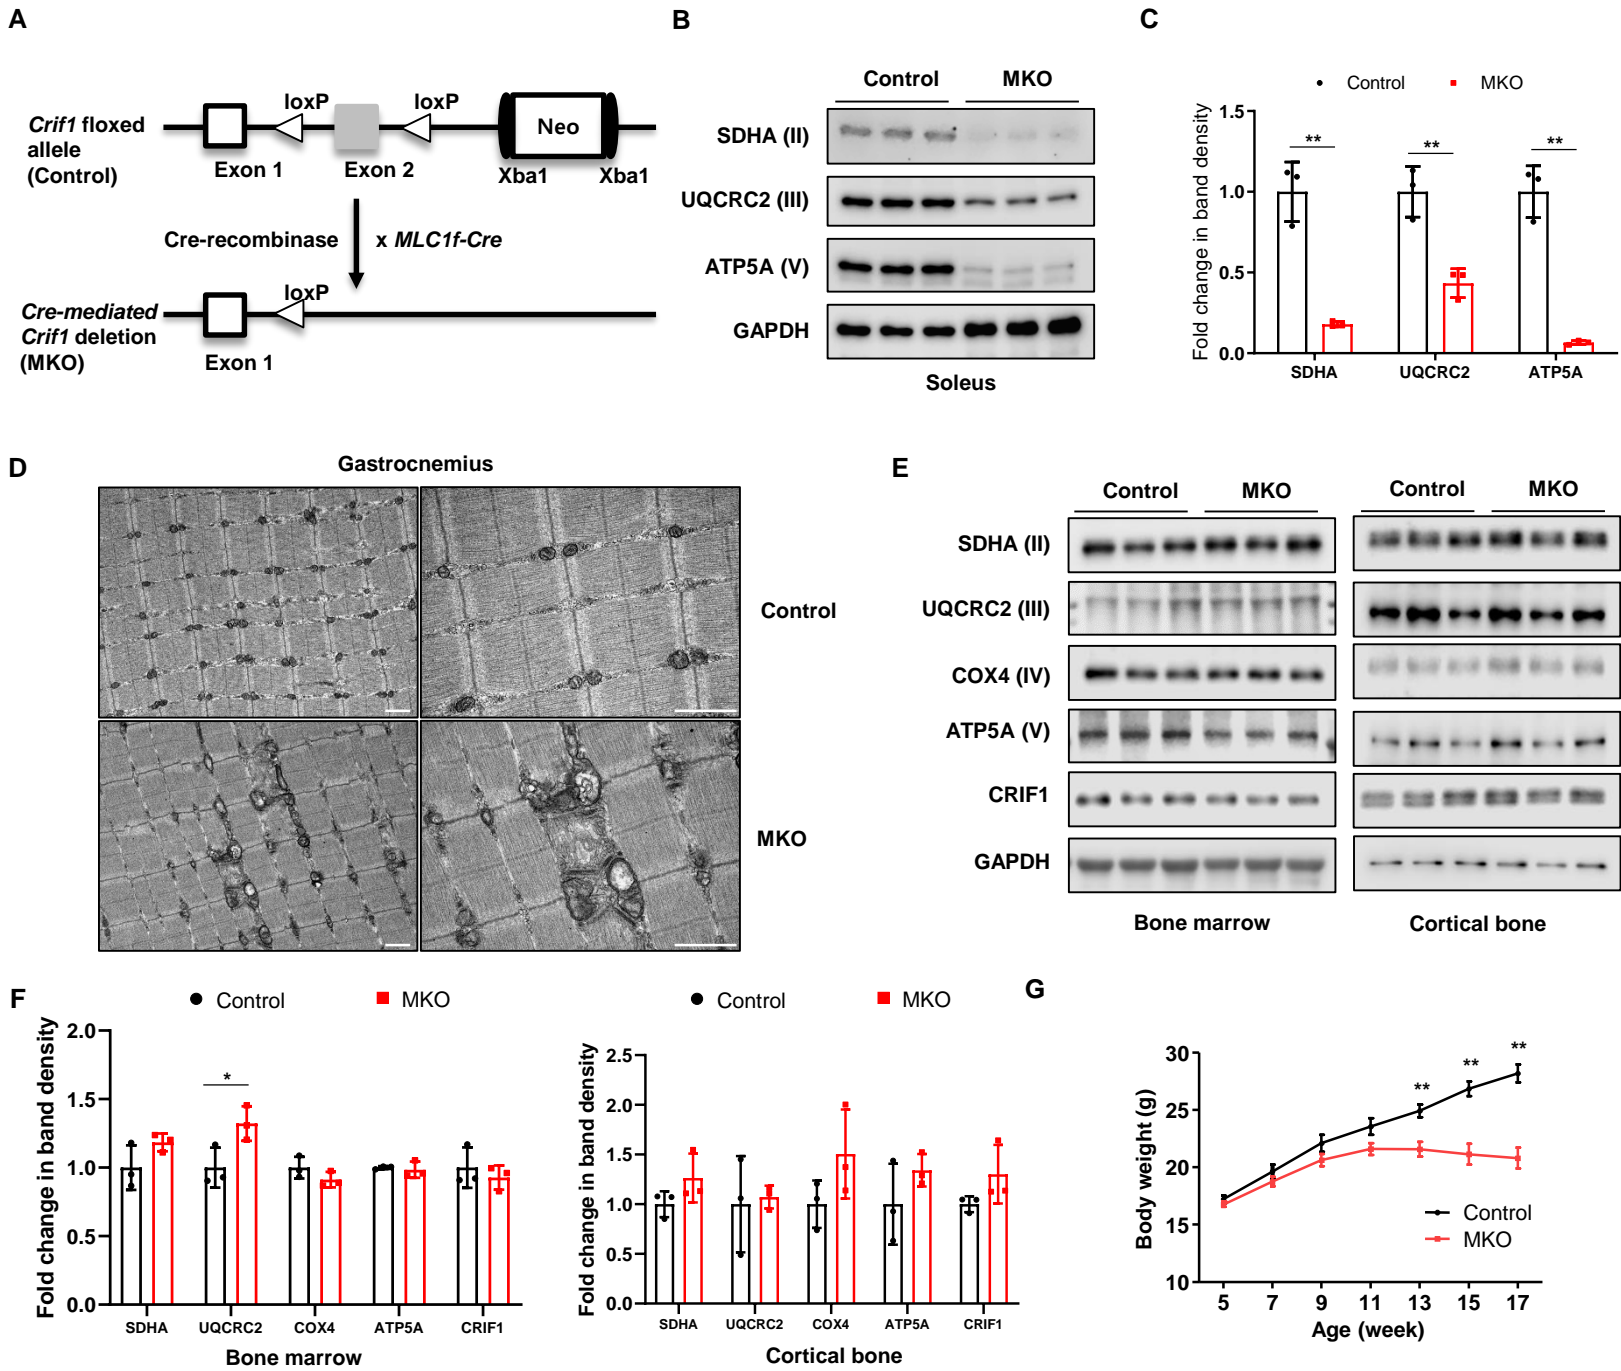

A

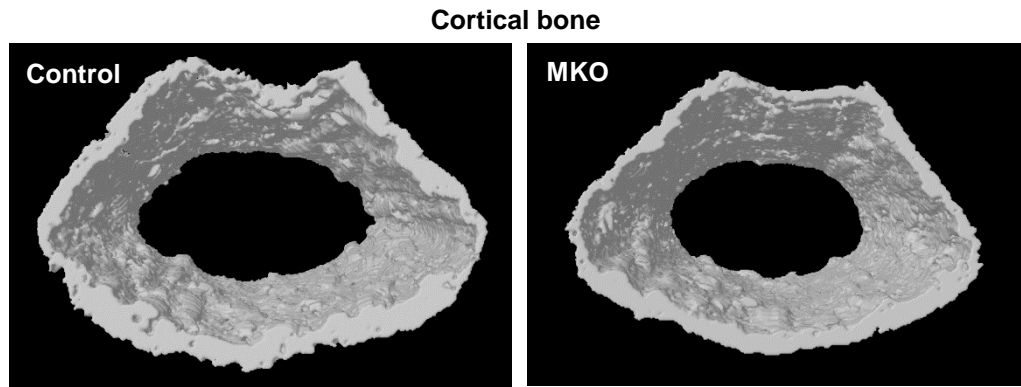

B

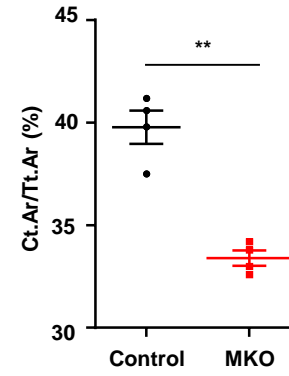

C

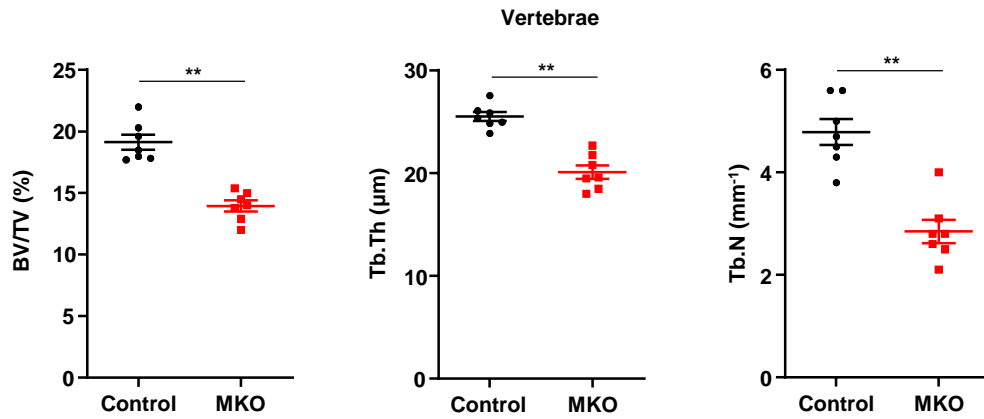

E

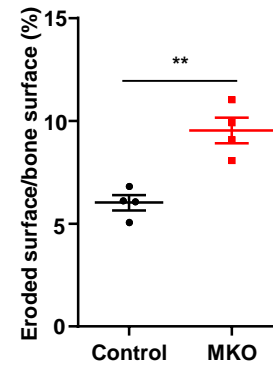

D

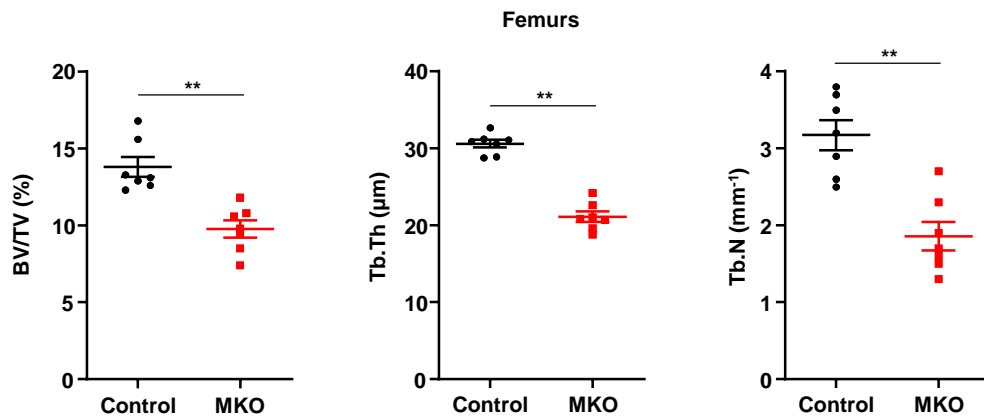

F

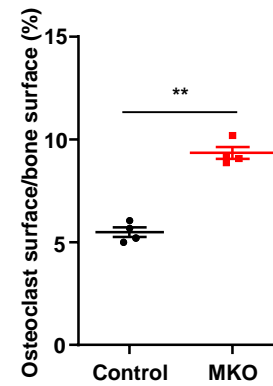

A

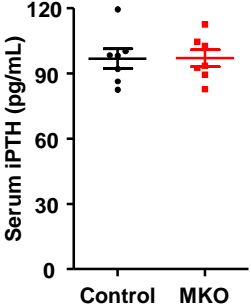

B

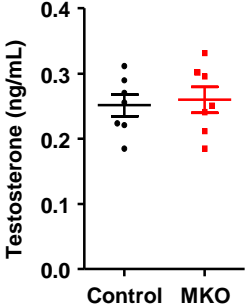

C

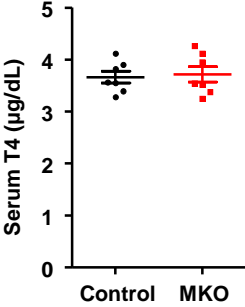

D

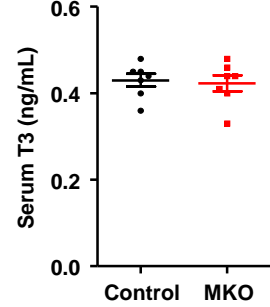

A

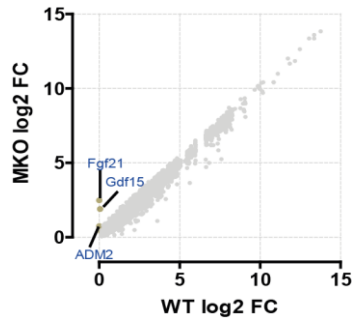

B

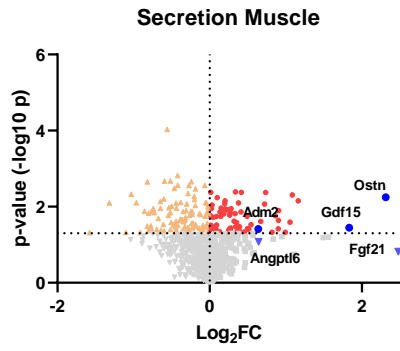

C

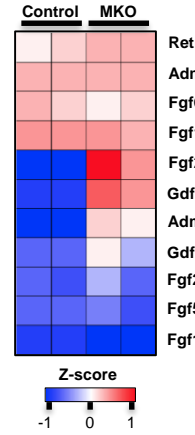

D

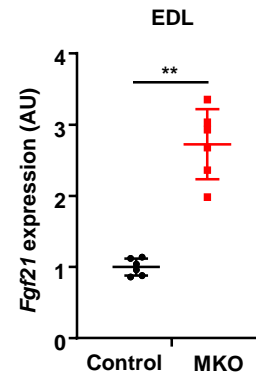

E

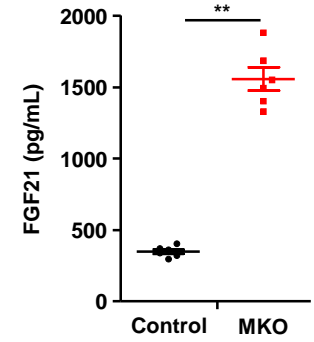

F

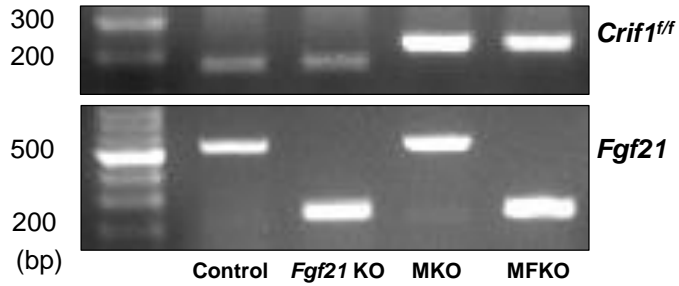

G

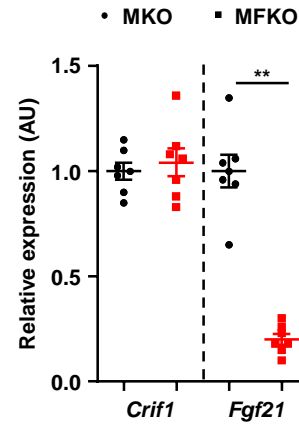

A

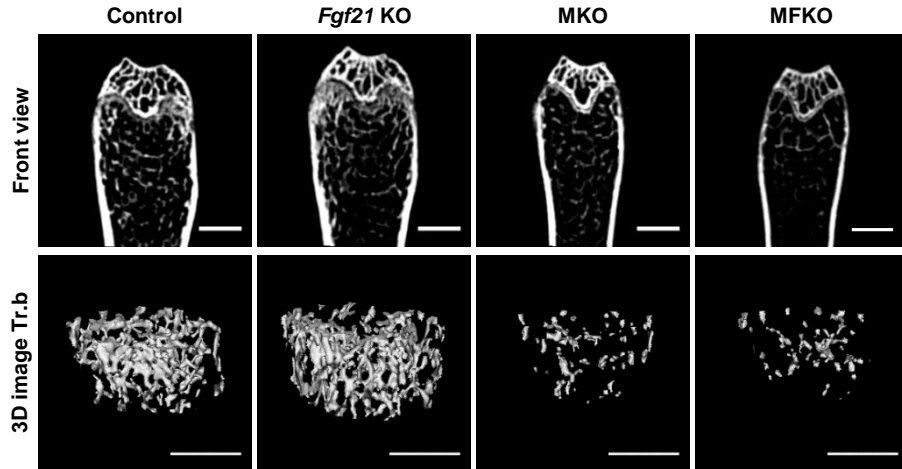

B

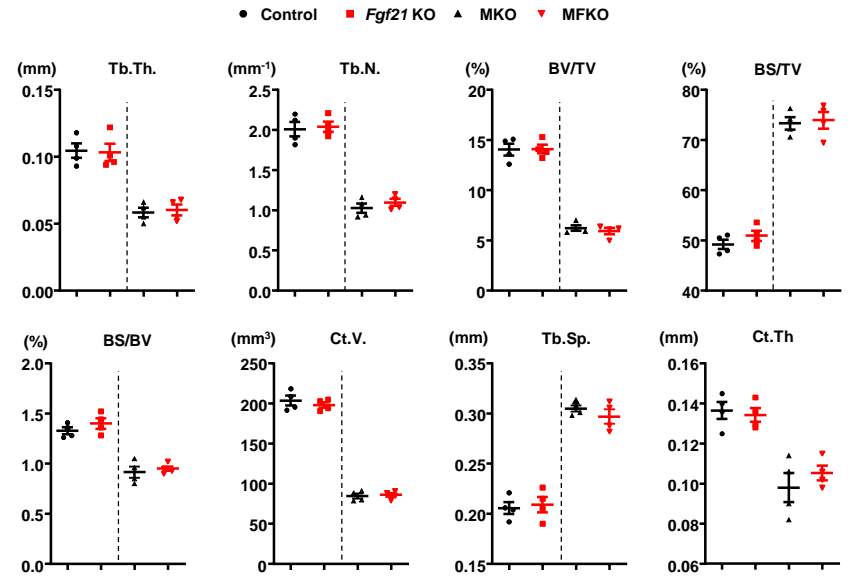

A

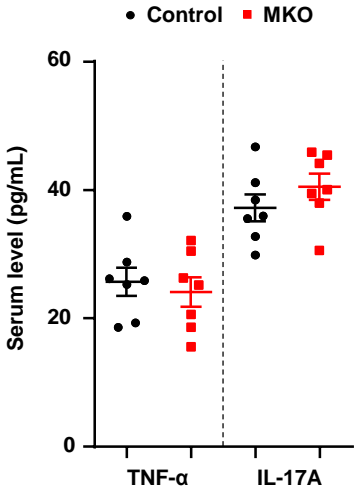

B

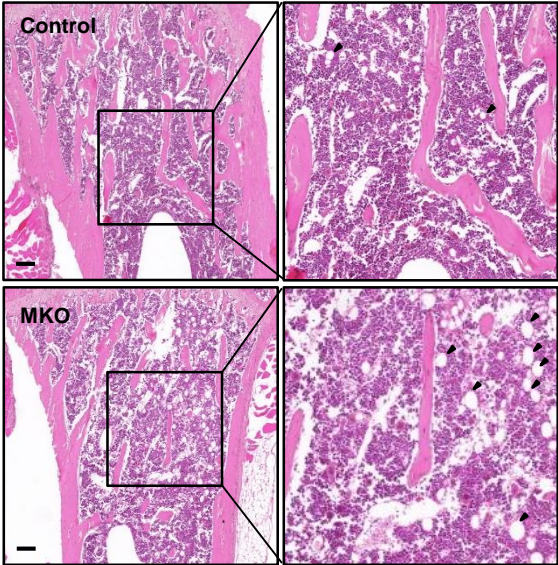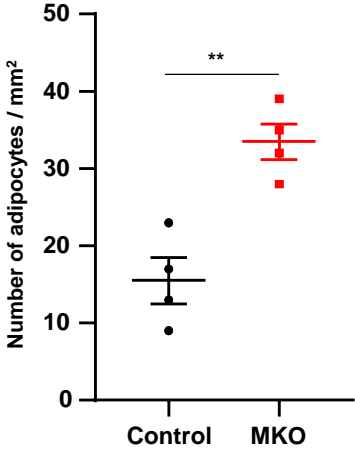



A

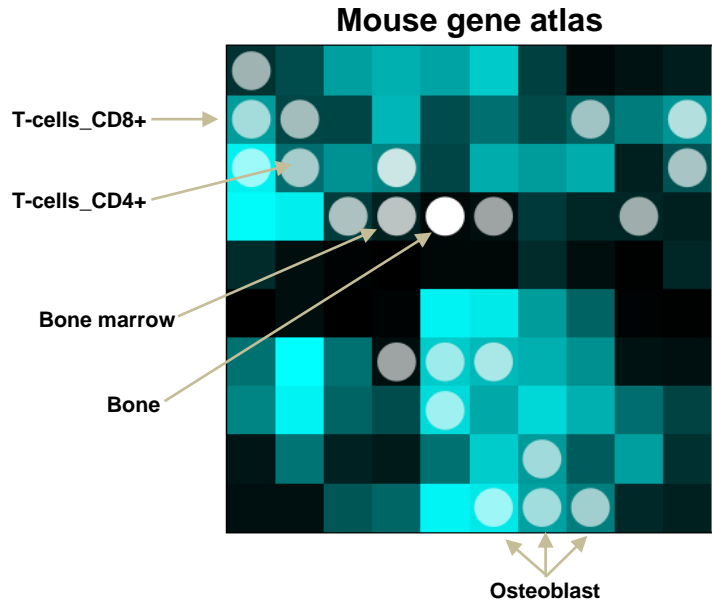

B

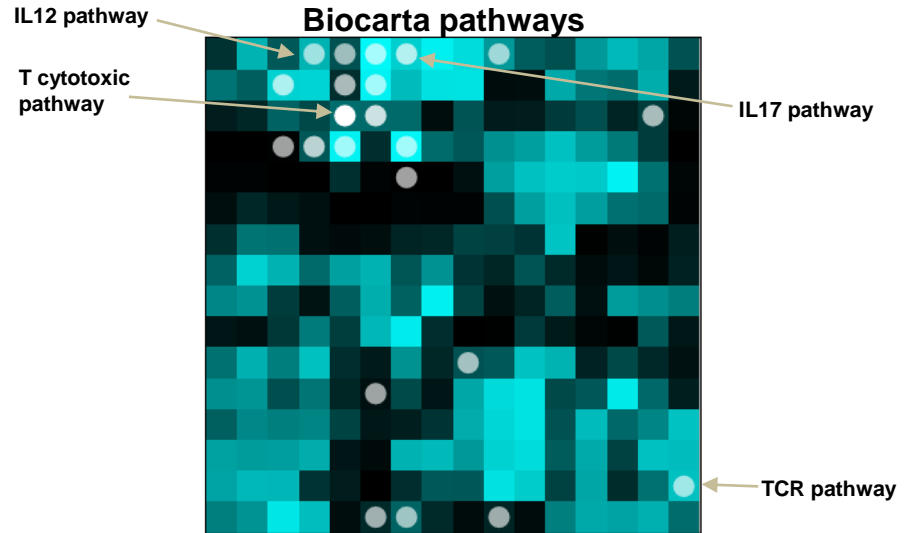

C

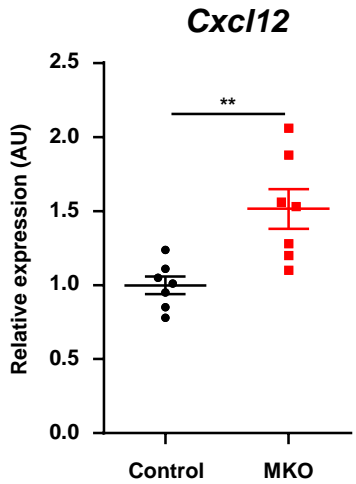

D

**Manhattan plot for modules associated with gene CXCL12**

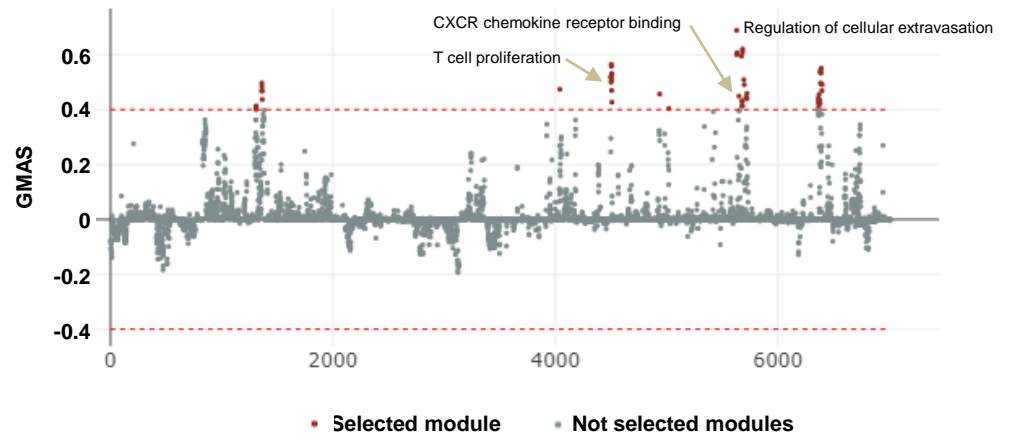

A

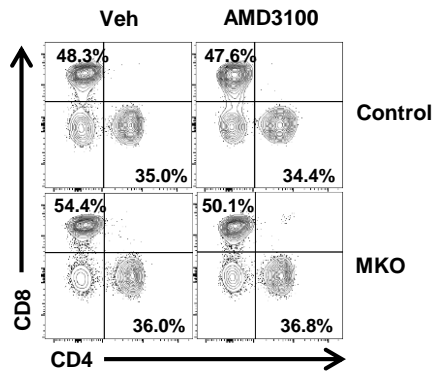

B

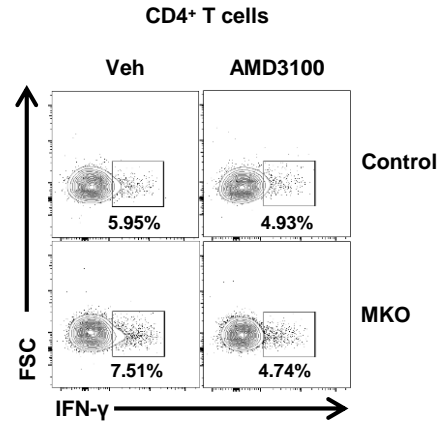

C

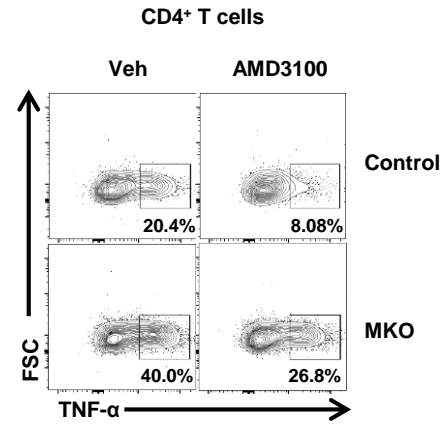

D

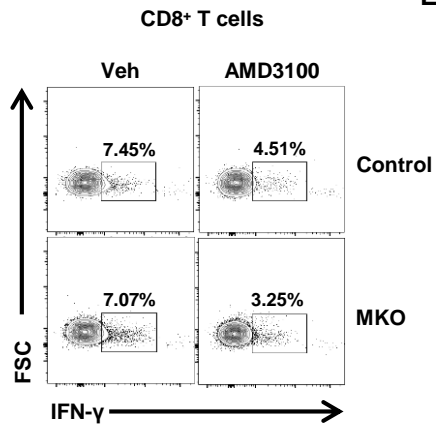

E

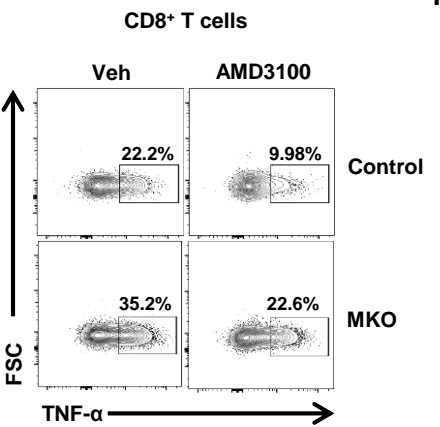

F

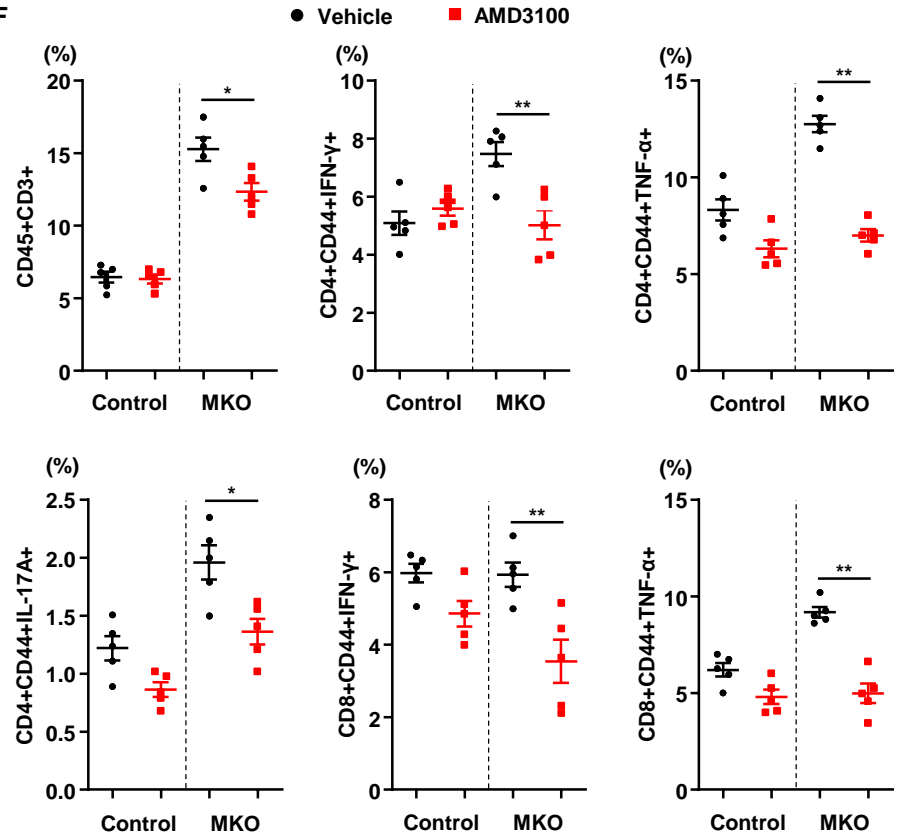

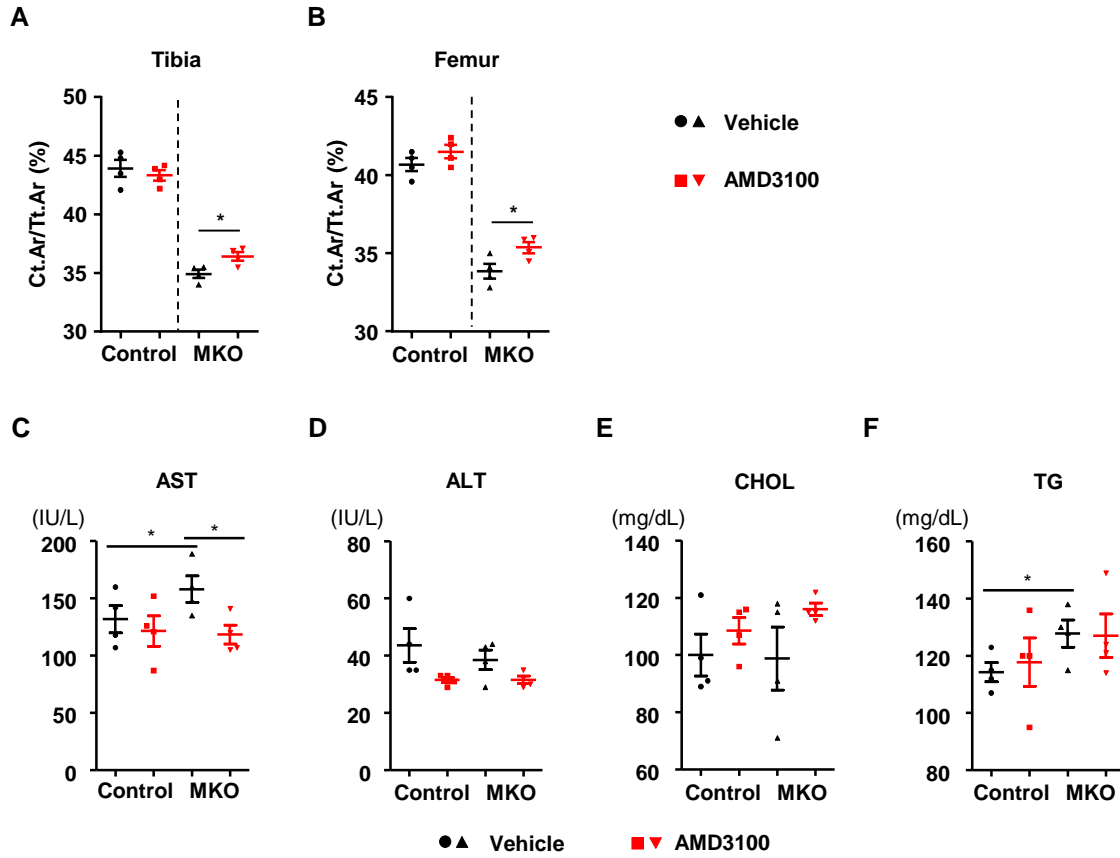

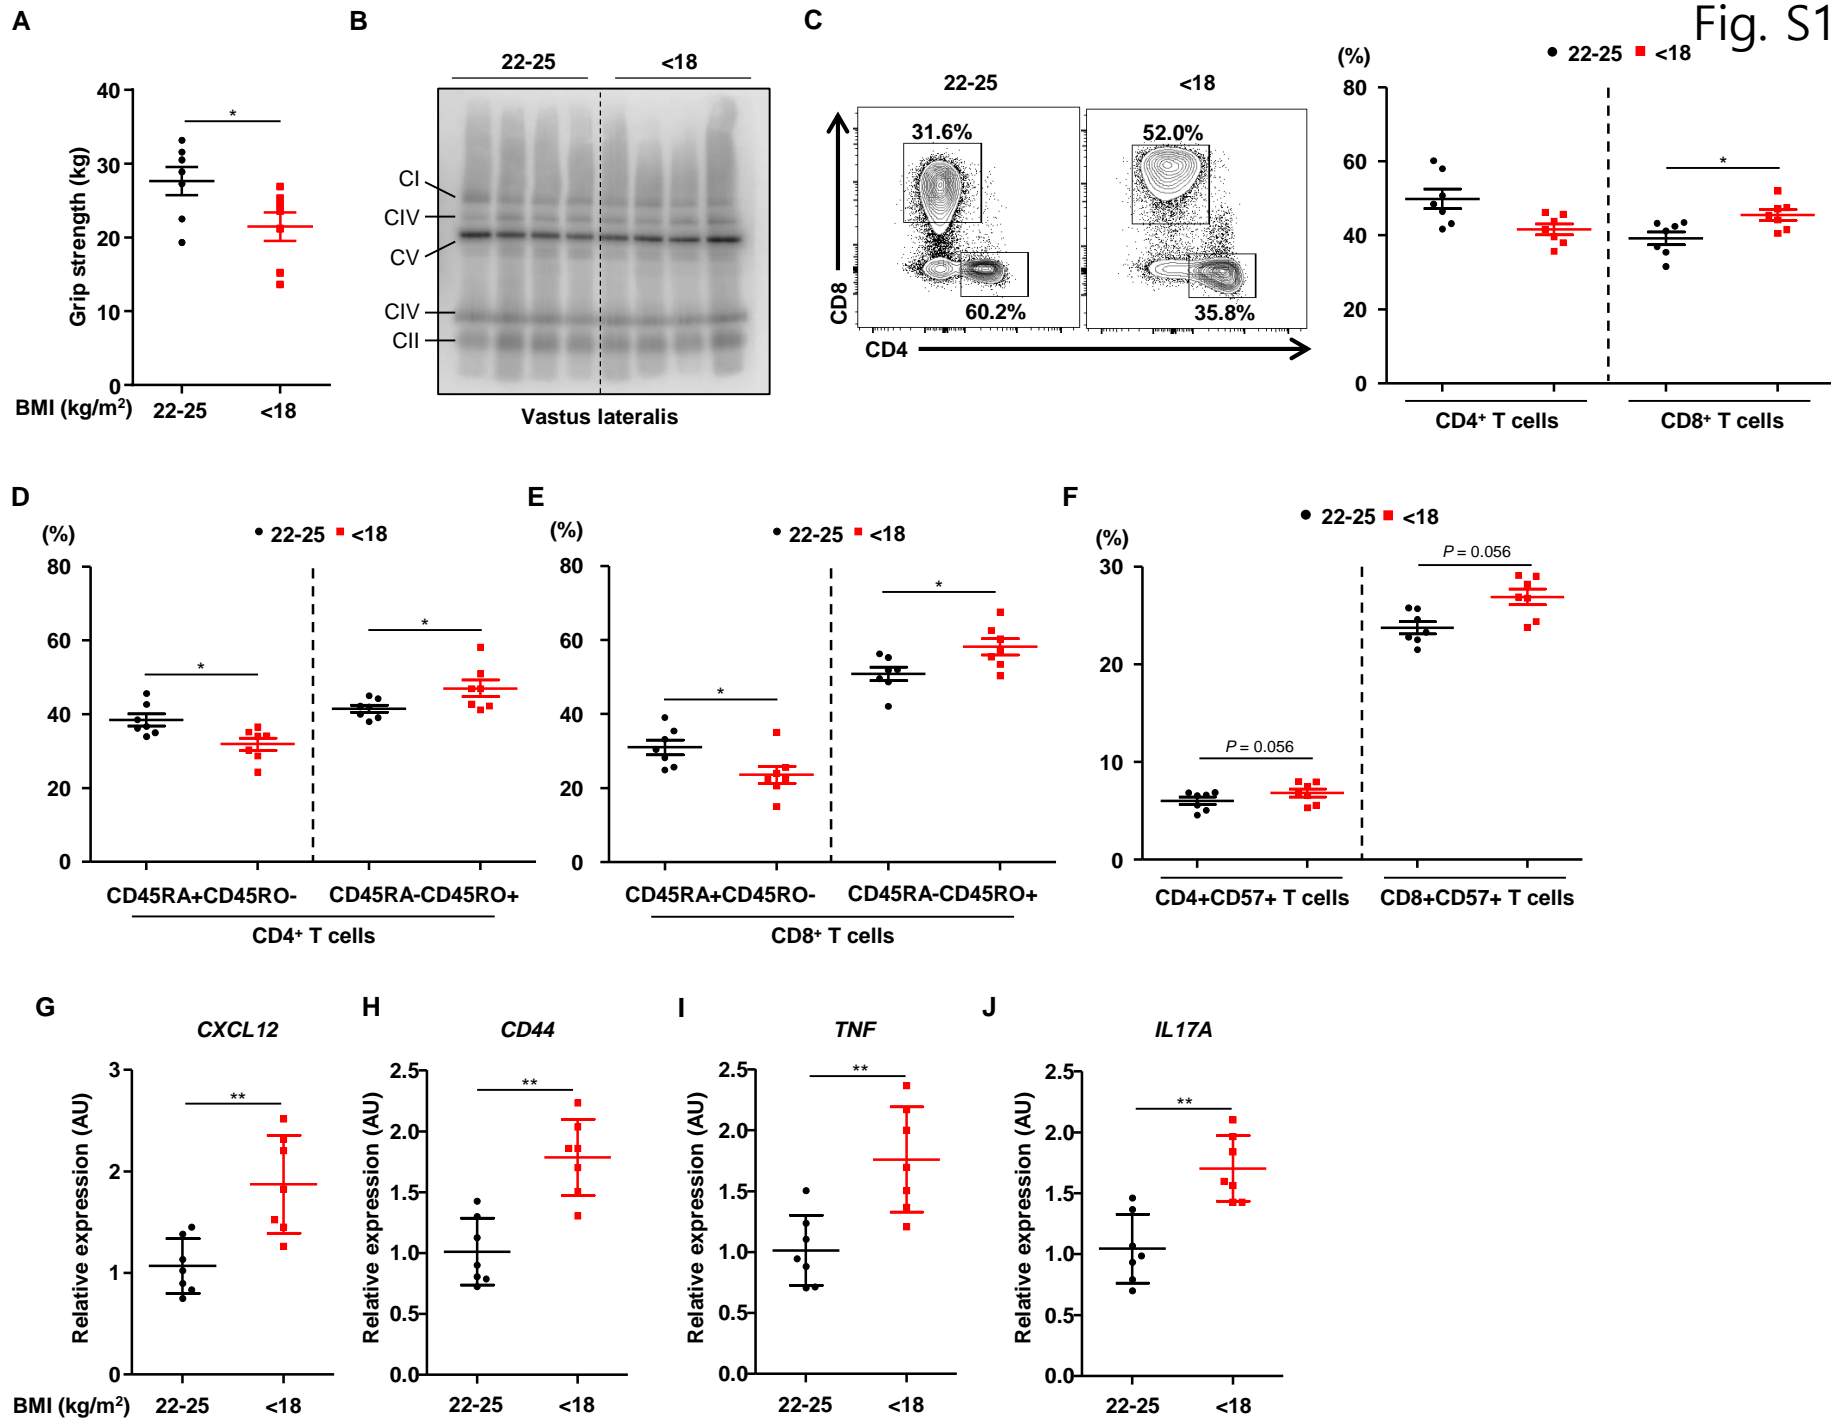

A

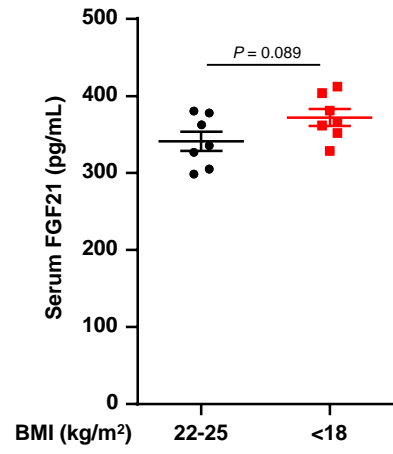

B

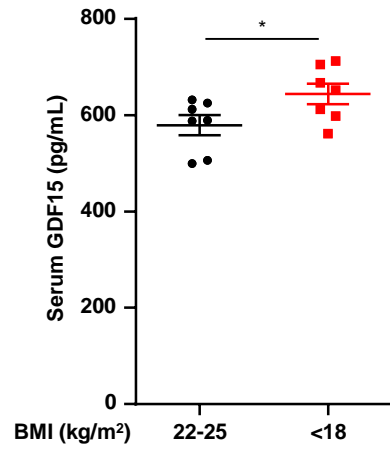

Supplement: JCSM-13-1785-s001.pdf [file JCSM-13-1785-s001.pdf]
